## RESEARCH ARTICLE

# GPN does not release lysosomal $\text{Ca}^{2+}$ but evokes $\text{Ca}^{2+}$ release from the ER by increasing the cytosolic pH independently of cathepsin C

Peace Atakpa, Laura M. van Marrewijk, Michael Apta-Smith, Sumita Chakraborty and Colin W. Taylor\*

## ABSTRACT

The dipeptide glycyl-L-phenylalanine 2-naphthylamide (GPN) is widely used to perturb lysosomes because its cleavage by the lysosomal enzyme cathepsin C is proposed to rupture lysosomal membranes. We show that GPN evokes a sustained increase in lysosomal pH ( $\text{pH}_{\text{ly}}$ ), and transient increases in cytosolic pH ( $\text{pH}_{\text{cyt}}$ ) and  $\text{Ca}^{2+}$  concentration ( $[\text{Ca}^{2+}]_{\text{c}}$ ). None of these effects require cathepsin C, nor are they accompanied by rupture of lysosomes, but they are mimicked by structurally unrelated weak bases. GPN-evoked increases in  $[\text{Ca}^{2+}]_{\text{c}}$  require  $\text{Ca}^{2+}$  within the endoplasmic reticulum (ER), but they are not mediated by ER  $\text{Ca}^{2+}$  channels amplifying  $\text{Ca}^{2+}$  release from lysosomes. GPN increases  $[\text{Ca}^{2+}]_{\text{c}}$  by increasing  $\text{pH}_{\text{cyt}}$ , which then directly stimulates  $\text{Ca}^{2+}$  release from the ER. We conclude that physiologically relevant increases in  $\text{pH}_{\text{cyt}}$  stimulate  $\text{Ca}^{2+}$  release from the ER in a manner that is independent of  $\text{IP}_3$  and ryanodine receptors, and that GPN does not selectively target lysosomes.

**KEY WORDS:**  $\text{Ca}^{2+}$  signals, Cathepsin C, Cytosolic pH, Endoplasmic reticulum, GPN, Lysosome

## INTRODUCTION

Lysosomes are dynamic, membrane-bound organelles that maintain a low luminal pH ( $\text{pH}_{\text{ly}} \sim 4.5$ ) (Johnson et al., 2016). More than fifty degradative enzymes within lysosomes allow them to degrade materials imported by endocytosis, and to recycle intracellular materials by autophagy (Luzio et al., 2014; Rubinsztein et al., 2012). Lysosomes coordinate responses to nutrient deprivation through their ability to sense amino acids, and regulate the biogenesis of lysosomes and autophagy proteins (Sabatini, 2017). They also mediate transfer of cholesterol and other lipids between membranes, and they contribute to membrane repair (Thelen and Zoncu, 2017). Lysosomes also sequester  $\text{Ca}^{2+}$  and express  $\text{Ca}^{2+}$ -permeable channels, notably transient receptor protein mucolipin (TRPML1), two pore channel type 2 (TPC2, encoded by *TPCN2*) and ATP-regulated  $\text{P}_2\text{X}_4$  receptor (P2RX4) (Morgan et al., 2011). These proteins allow  $\text{Ca}^{2+}$  to regulate lysosomal behaviour and allow lysosomes to contribute to cytosolic  $\text{Ca}^{2+}$  signalling (López Sanjurjo et al., 2013). There are, however, few

pharmacological opportunities to disable lysosomes: inhibition of the lysosomal V-ATPase (with bafilomycin  $\text{A}_1$  or concanamycin A) allows the lysosomal pH gradient to be dissipated (Drose and Altendorf, 1997), and glycyl-L-phenylalanine 2-naphthylamide (L-GPN, hereafter referred to as GPN) is widely used, purportedly to disrupt lysosomal membranes (Fig. 1A).

Many molecules, typically amphipathic weak bases, accumulate within lysosomes because they are sufficiently lipophilic at neutral pH to cross biological membranes, but at low  $\text{pH}_{\text{ly}}$  they are protonated and trapped in the lysosome lumen, where they can become highly concentrated (Nadanaciva et al., 2011). These molecules, which include many drugs in clinical use, are described as ‘lysosomotropic’. Accumulation of lysosomotropic molecules within lysosomes increases  $\text{pH}_{\text{ly}}$ , and the high concentrations achieved can perturb lysosomal functions. Sphingosine, for example, concentrates within lysosomes, disrupting lipid domains and allowing molecules to leak across the membrane (Villamil Giraldo et al., 2014).

Cathepsin C (CTSC, also known as dipeptidyl peptidase 1) is widely supposed to be expressed mainly within lysosomes (Rao et al., 1997), where it cleaves a pair of N-terminal residues from its peptide substrates until it reaches a proline or basic residue. At neutral pH, cathepsin C can also polymerise dipeptides (McGuire et al., 1992; Thiele and Lipsky, 1990). These properties of cathepsin C have been exploited to allow selective disruption of lysosomes. For example, the esterified dipeptide, L-leucyl-L-leucine methyl ester (LLOMe, also known as Leu-Leu-OMe), disrupts lysosomes and, thereby, triggers apoptosis. The likely mechanism involves an initial lysosomotropic accumulation of LLOMe within lysosomes, causing  $\text{pH}_{\text{ly}}$  to increase; cathepsin C then catalyses polymerisation of the de-esterified dipeptide and, as the hydrophobic polymer accumulates, it perturbs the lysosomal membrane, rendering it permeable to small molecules (molecular mass < 10 kDa) (Repnik et al., 2017; Thiele and Lipsky, 1990).

GPN (Fig. 1A), another synthetic substrate of cathepsin C, has been used extensively to perturb lysosomes, with ~100 publications reporting its use (e.g. Berg et al., 1994; Churchill et al., 2002; Coen et al., 2012; Davis et al., 2012; Dionisio et al., 2011; Fois et al., 2015; Garrity et al., 2016; Haller et al., 1996; Kilpatrick et al., 2013; Li et al., 2012; Melchionda et al., 2016; Morgan and Galione, 2007; Penny et al., 2015, 2014; Ruas et al., 2015). It is assumed that GPN disrupts lysosomes because it is degraded within them by cathepsin C (hence, its selectivity for lysosomes); then the dipeptide accumulates, generating osmotic stress that ruptures lysosome membranes (Berg et al., 1994). There is evidence (from release of dextran-conjugated fluorophores) that modified dipeptides can rupture lysosomes (e.g. Repnik et al., 2017), but many more papers mistakenly assume that loss of Acridine Orange or LysoTracker signifies rupture of lysosomes (e.g. Uchimoto et al.,

Department of Pharmacology, University of Cambridge, Tennis Court Road, Cambridge CB2 1PD, UK.

\*Author for correspondence (cwt1000@cam.ac.uk)

 C.W.T., 0000-0001-7771-1044

This is an Open Access article distributed under the terms of the Creative Commons Attribution License (<https://creativecommons.org/licenses/by/4.0>), which permits unrestricted use, distribution and reproduction in any medium provided that the original work is properly attributed.

Received 15 August 2018; Accepted 20 December 2018

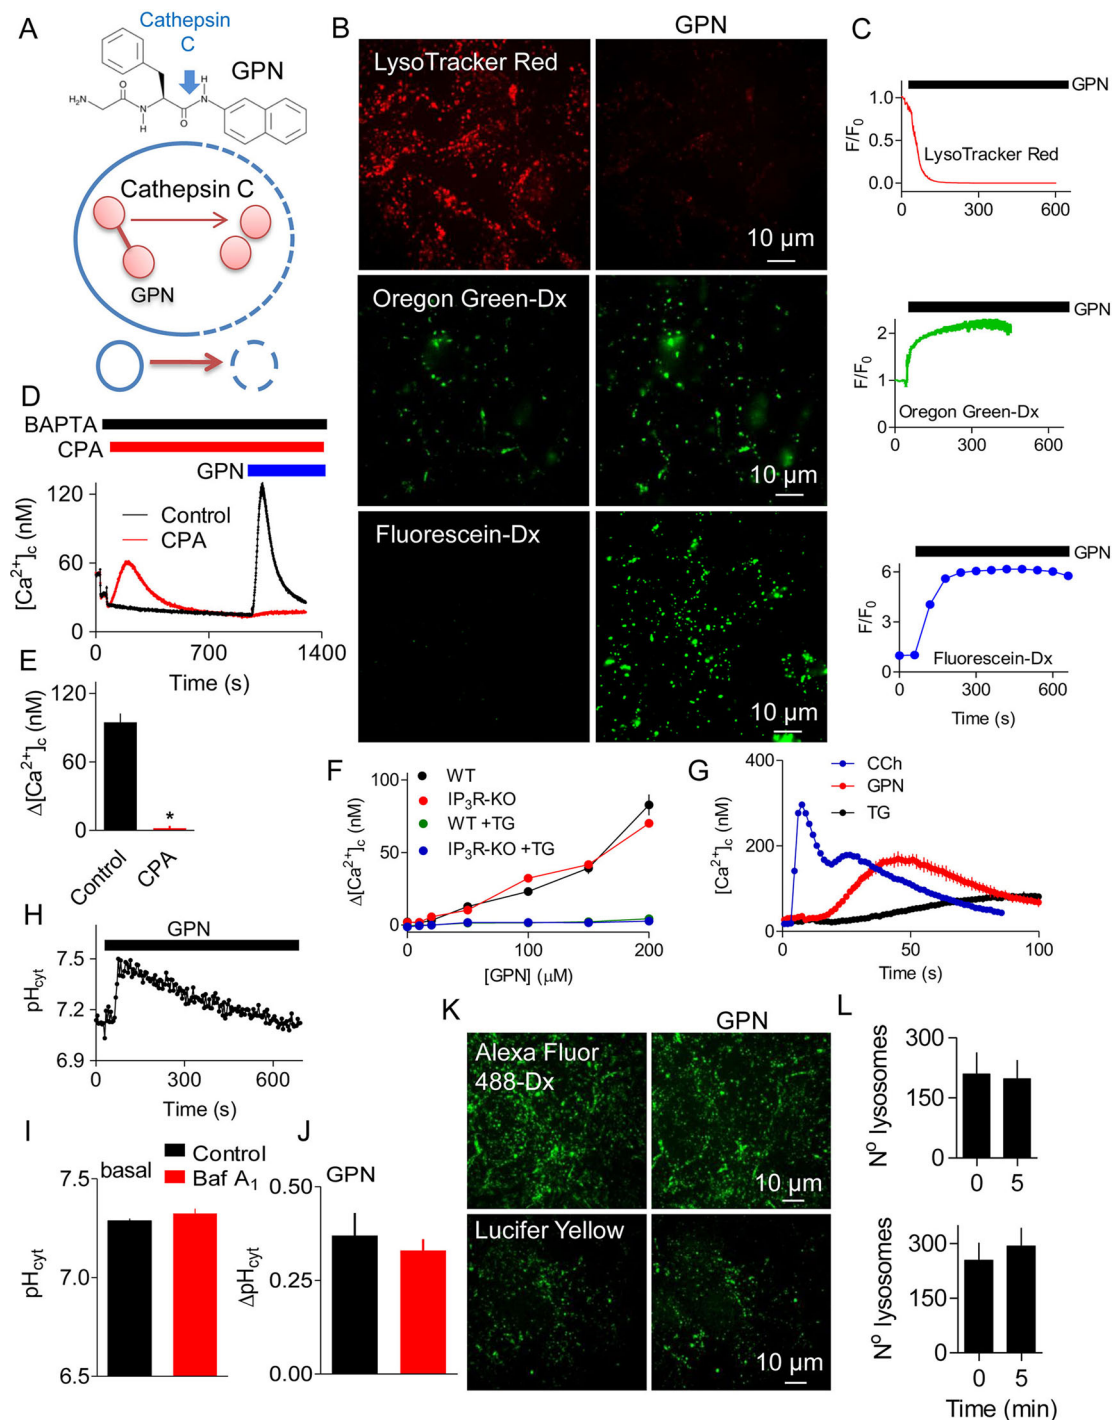

**Fig. 1. GPN changes pH and  $[Ca^{2+}]_c$  without rupturing lysosomes.** (A) GPN is proposed to disrupt lysosomes because its cleavage by cathepsin C (blue arrow) causes osmotic lysis. (B) HEK cells loaded with LysoTracker Red, or with dextran conjugates of Oregon Green or fluorescein report an increase in  $pH_{cyt}$  after addition of GPN (200  $\mu M$  for 200 s). Increased pH causes fluorescence to decrease for LysoTracker Red and increase for the other indicators. (C) Time courses of GPN-evoked changes in fluorescence ( $F/F_0$ ) of the  $pH_{cyt}$  indicators. Each trace shows mean  $\pm$  s.d. from 3–4 ROIs in a single cell (summarised in Fig. 3F,H). (D) BAPTA (2.5 mM) was added to chelate extracellular  $Ca^{2+}$ , and cyclopiazonic acid (CPA, 20  $\mu M$ ) to inhibit SERCAs, before the addition of GPN (200  $\mu M$ ) to fluo 8-loaded HEK cells. Results show mean  $\pm$  s.d. for 3 replicates. (E) Summary results (mean  $\pm$  s.e.m.,  $n=3$ ) from analyses similar to those in panel D show peak increase in  $[Ca^{2+}]_c$  ( $\Delta[Ca^{2+}]_c$ ) evoked by GPN.  $*P<0.05$ , Student's  $t$ -test. (F) Wild-type HEK cells (WT) or HEK cells without  $IP_3$ Rs ( $IP_3$ R-KO) kept in  $Ca^{2+}$ -free HBS were either stimulated with 200  $\mu M$  GPN alone or treated with 1  $\mu M$  thapsigargin (TG) for 15 min followed by addition of 200  $\mu M$  GPN. Results (mean  $\pm$  s.e.m.,  $n=4$ , with 3 replicates) show  $\Delta[Ca^{2+}]_c$ . The green symbols are obscured by the overlying blue symbols. (G) Initial responses of HEK cells to carbachol (CCh, 1 mM), GPN (200  $\mu M$ ) or thapsigargin (TG, 1  $\mu M$ ) in  $Ca^{2+}$ -free HBS (mean  $\pm$  s.d. of 3 replicates). A summary of these data is shown in Fig. S1C,D. (H) Effect of GPN (200  $\mu M$ ) on  $pH_{cyt}$  determined using the pH indicator SNARF-5F in populations of HEK cells. (I,J) Effects of bafilomycin  $A_1$  (Baf  $A_1$ , 1  $\mu M$ , 1 h) on basal  $pH_{cyt}$  (I) and on the  $\Delta pH_{cyt}$  evoked by GPN (200  $\mu M$ , 200 s) (J). Results (mean  $\pm$  s.e.m.,  $n=5$ , each with 3 replicates) show no significant effect of Baf  $A_1$  (Student's  $t$ -test). (K) Representative confocal images show that GPN (200  $\mu M$ , 10 min) had no effect on the punctate distribution of endocytosed Lucifer Yellow ( $M_r$  447) or Alexa Fluor 488-coupled dextran ( $M_r$  ~10,000). (L) Number of lysosomes identified before (0 min) and 5 min after GPN addition in at least 3 cells per coverslip. Mean  $\pm$  s.e.m.,  $n=3$  independent coverslips (Alexa Fluor 488-Dx, top graph) and  $n=4$  independent coverslips (Lucifer Yellow, bottom graph).

1999). However, Acridine Orange and LysoTracker, like other lysosomotropic agents, will redistribute across intact lysosomal membranes when  $pH_{ly}$  increases.

The widespread use of GPN to acutely assess the  $Ca^{2+}$  content of lysosomes and the lack of evidence that these effects are mediated by cathepsin C encouraged us to assess both the mechanism of action of GPN and its selectivity for lysosomes. We show that GPN evokes a rapid and sustained increase in  $pH_{ly}$ , and transient increases in cytosolic pH ( $pH_{cyt}$ ) and cytosolic free  $Ca^{2+}$  concentration ( $[Ca^{2+}]_c$ ). None of these responses requires cathepsin C activity; neither are they accompanied by detectable rupture of lysosome membranes. Rather than selectively stimulating  $Ca^{2+}$  release from lysosomes, GPN increases  $[Ca^{2+}]_c$  by causing an increase in  $pH_{cyt}$  that then stimulates  $Ca^{2+}$  release from the ER by a mechanism that requires neither inositol 1,4,5-trisphosphate ( $IP_3$ ) receptors nor ryanodine receptors.

## RESULTS

### GPN evokes pH changes and $Ca^{2+}$ signals without rupturing lysosomes

GPN is widely used to dissipate the lysosomal pH gradient and release  $Ca^{2+}$  from lysosomes (see Introduction) (Fig. 1A). In HEK cells, GPN caused a sustained increase in  $pH_{ly}$  and a transient increase in  $[Ca^{2+}]_c$  (Fig. 1B–F, Fig. S1A,B). The  $Ca^{2+}$  signals evoked by GPN were slower than those evoked by carbachol, which stimulates  $IP_3$  formation and  $Ca^{2+}$  release through  $IP_3$  receptors ( $IP_3Rs$ ), but faster than those evoked by inhibiting the ER  $Ca^{2+}$  pumps (sarcoplasmic/endoplasmic reticulum  $Ca^{2+}$ -ATPases, SERCAs) with cyclopiazonic acid (CPA) or thapsigargin (Fig. 1D, G, Fig. S1C,D). While these results are consistent with the reported actions of GPN, additional observations are not consistent with its presumed mode of action (Fig. 1A).

First, GPN caused a rapid and transient increase in cytosolic pH ( $pH_{cyt}$ ) (Fig. 1H). Rupture of acidic lysosomes would be expected to decrease  $pH_{cyt}$ , as occurs, for example, when tumour necrosis factor alpha ( $TNF\alpha$ ) triggers loss of  $H^+$  and cathepsin D from lysosomes during the early stages of apoptosis (Nilsson et al., 2006). Similarly transient increases in  $pH_{cyt}$  were observed in other cell types and with different sources of GPN (Fig. S1E,F). Dissipation of the lysosomal pH gradient by inhibiting the V-ATPase with bafilomycin  $A_1$  had no effect on basal  $pH_{cyt}$  or the subsequent GPN-evoked increase in  $pH_{cyt}$  (Fig. 1I,J). These results show that  $H^+$  within lysosomes does not contribute to GPN-evoked changes in  $pH_{cyt}$ . Since  $Ca^{2+}$  indicators are pH-sensitive (see Speake and Elliott, 1998), we confirmed that the affinity of fluo 8 for  $Ca^{2+}$  was unaffected by changing pH between 7 and 8 (Fig. S2), indicating that the GPN-evoked increases in fluo 8 fluorescence are due to an increase in  $[Ca^{2+}]_c$  (Fig. 1D–F).

Second, the acute effects of GPN on  $pH_{ly}$  and  $pH_{cyt}$  were not accompanied by loss of endocytosed fluorescent molecules with molecular masses ranging from 447 (Lucifer Yellow), through ~3 kDa (fluorescein-dextran) to ~10 kDa (dextran conjugates of Alexa Fluor 488 and Oregon Green) (Fig. 1B,K,L, Fig. S1G). These results are not consistent with the effects of GPN on pH or  $[Ca^{2+}]_c$  arising from rupture of lysosomes. More prolonged incubations with GPN (>10 min) caused some loss of lysosomal Alexa Fluor 488-dextran but, even after 25 min, most was retained by lysosomes (Fig. S3).

Third, the increase in  $[Ca^{2+}]_c$  evoked by GPN was abolished by depleting the ER of  $Ca^{2+}$  by using CPA or thapsigargin to inhibit SERCAs (Fig. 1D,F). Thapsigargin had no effect on the GPN-evoked increases in  $pH_{ly}$  or  $pH_{cyt}$  (Fig. S1H,I). Although no

SERCAs were detected in the proteome of lysosomal membranes (Bagshaw et al., 2005; Chapel et al., 2013), it has been suggested that a SERCA with reduced  $Ca^{2+}$  affinity, i.e. SERCA3, may contribute to  $Ca^{2+}$  uptake by acidic stores (López et al., 2005). We, therefore, considered whether inhibition of GPN-evoked cytosolic  $Ca^{2+}$  signals by thapsigargin and CPA is due to direct inhibition of lysosomal  $Ca^{2+}$  sequestration. However,  $IP_3$ -evoked  $Ca^{2+}$  release from the ER also massively and rapidly attenuated the cytosolic  $Ca^{2+}$  signals evoked by GPN (Fig. S4). This confirms that loss of  $Ca^{2+}$  from the ER, rather than inhibition of SERCAs themselves, rapidly inhibits GPN-evoked increases in  $[Ca^{2+}]_c$ .

### GPN does not stimulate $Ca^{2+}$ -induced $Ca^{2+}$ release from the ER

Others have suggested that GPN-evoked  $Ca^{2+}$  release from lysosomes is amplified by  $Ca^{2+}$ -induced  $Ca^{2+}$  release (CICR) by  $IP_3Rs$  or ryanodine receptors (RyRs) in the ER, and that this accounts for the inhibition of GPN responses by thapsigargin (Kilpatrick et al., 2013). Although HEK and HAP1 cells appear not to express functional RyRs (Fig. S5A,B) (Tong et al., 1999), we confirmed that ryanodine (to inhibit RyRs) had no effect on the increase in  $[Ca^{2+}]_c$  evoked by GPN (Fig. S5C,D). Complete loss of  $IP_3Rs$  in HEK (Alzayady et al., 2016) or HAP1 cells (Atakpa et al., 2018) by means of CRISPR/Cas9 had no effect on the  $Ca^{2+}$  signals evoked by GPN. In each case, the response to GPN was abolished by thapsigargin (Fig. 1F, Fig. S5E).

Transmembrane coiled-coil domain 1 (TMCO1) is an ER membrane protein that oligomerises to form a  $Ca^{2+}$  pore as the ER overloads with  $Ca^{2+}$  (Fig. 2A) (Wang et al., 2016). TMCO1 might, thereby, allow GPN-evoked  $Ca^{2+}$  release from lysosomes to be amplified. We failed, using CRISPR/Cas9, to achieve complete knockout of TMCO1 in HEK cells but, with TMCO1 expression reduced by  $67\pm 14\%$  (Fig. 2B), we observed the expected increase in carbachol-evoked  $Ca^{2+}$  signals (Wang et al., 2016). However, there was no effect on the increase in  $[Ca^{2+}]_c$  evoked by GPN (Fig. 2C,D). We, therefore, conclude that none of the known mechanisms (RyR,  $IP_3R$  and TMCO1) that can mediate CICR from the ER contributed to the GPN-evoked increase in  $[Ca^{2+}]_c$ . The results, so far, demonstrate that GPN increases  $pH_{ly}$  and  $[Ca^{2+}]_c$ , but they challenge the conventional explanations of these phenomena.

### Effects of GPN on $pH_{ly}$ , $pH_{cyt}$ and cytosolic $Ca^{2+}$ do not require cathepsin C

The effects of GPN are thought to require its proteolysis by cathepsin C (Fig. 1A), an enzyme that is widely assumed to be expressed mainly in lysosomes (Rao et al., 1997; Wolters and Chapman, 2000). This distribution of cathepsin C is invoked to suggest that GPN selectively targets lysosomes. Three approaches were adopted to assess the contribution of cathepsin C to the effects of GPN. We used CRISPR/Cas9 to generate HEK cells devoid of cathepsin C activity (HEK-CTSC-KO) (Fig. 3A–C). We used prolonged treatment with a selective peptide inhibitor of cathepsin C (Gly-Phe-DMK) (Méthot et al., 2007; Repnik et al., 2017), and demonstrated that it effectively inhibited enzyme activity in HEK cell lysates (Fig. 3B,C). We also used glycyl-D-phenylalanine (D-GPN), in which the L-phenylalanine of L-GPN (hitherto described as GPN) is replaced by D-phenylalanine, because D-GPN, unlike L-GPN, is not a substrate for cathepsin C (Jadot et al., 1990).

GPN caused the usual sustained increase in  $pH_{ly}$  in HEK cells without cathepsin C. Furthermore, in normal HEK cells, GPN and D-GPN caused indistinguishable increases in  $pH_{ly}$  (Fig. 3D–H).

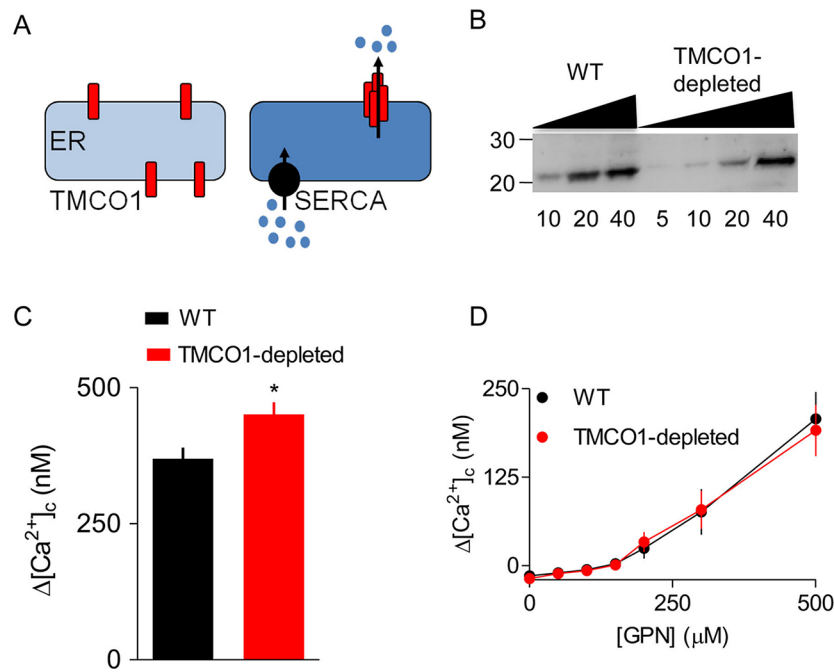

**Fig. 2. CICR mediated by TMCO1 does not contribute to GPN-evoked increases in  $[Ca^{2+}]_c$ .** (A) TMCO1 has been proposed to oligomerise into a functional  $Ca^{2+}$ -permeable channel as the ER loads with  $Ca^{2+}$  (Wang et al., 2016). Hence, TMCO1 might be able to mediate CICR because  $Ca^{2+}$  released by other intracellular channels fuels ER  $Ca^{2+}$  uptake by SERCAs, leading to  $Ca^{2+}$  overload and opening of TMCO1. (B) Typical western blot showing expression of TMCO1 in HEK cells in which CRISPR/Cas9 was used to achieve a partial knockdown of TMCO1 ( $67 \pm 14\%$ ,  $n=4$ , mean  $\pm$  s.d.). Molecular mass markers (kDa) and protein loadings ( $\mu$ g) are shown. (C,D) Peak  $Ca^{2+}$  signals evoked by a maximally effective concentration of carbachol (C) or the indicated concentrations of GPN (D) in  $Ca^{2+}$ -free HBS (mean  $\pm$  s.e.m.,  $n=3$ ). \* $P < 0.05$ , Student's *t*-test.

These results establish that the effects of GPN on  $pH_{Iy}$  do not require cathepsin C activity. Neither loss of cathepsin C nor its pharmacological inhibition affected  $pH_{cyt}$  or the basal  $[Ca^{2+}]_c$  in unstimulated cells (Fig. 4A,B). In addition, pharmacological inhibition of cathepsin C had no effect on the increase in  $pH_{cyt}$  or  $[Ca^{2+}]_c$  evoked by addition of GPN (Fig. 4C,D). Furthermore, the concentration-dependent effects of GPN on  $pH_{cyt}$  and  $[Ca^{2+}]_c$  were indistinguishable in HEK cells with and without endogenous cathepsin C (Fig. 4E,F). Finally,  $D$ -GPN, like GPN, caused the same concentration-dependent increases in  $pH_{cyt}$  and  $[Ca^{2+}]_c$  as GPN (Fig. 4G,H).

LLOMe is a substrate of cathepsin C and, like GPN, it is a weak base but it is less membrane-permeable than GPN (Table S1). We confirmed that LLOMe caused lysis of lysosomes only in cells expressing cathepsin C (Fig. S6A), which is consistent with published work (Repnik et al., 2017). LLOMe also caused the expected increase in  $pH_{Iy}$  but it minimally affected  $pH_{cyt}$  and had no effect on  $[Ca^{2+}]_c$  (Fig. S6B-F). These results demonstrate that the effects of GPN on  $pH_{Iy}$ ,  $pH_{cyt}$  and  $[Ca^{2+}]_c$  do not require cathepsin C, whereas LLOMe causes cathepsin C-mediated lysis of lysosomes without increasing  $[Ca^{2+}]_c$ .

#### Other weak bases evoke ER-dependent $Ca^{2+}$ signals

GPN, but not  $D$ -GPN, is a substrate for cathepsin C; however, both are amphipathic weak bases (Table S1), which, in common with other lysosomotropic agents, accumulate within lysosomes (Fig. 5A) (Nadanaciva et al., 2011; Villamil Giraldo et al., 2014). We, therefore compared the actions of GPN with those of  $NH_4Cl$ , another lysosomotropic agent that is often used to increase  $pH_{Iy}$  (e.g. Johnson et al., 2016), and with fluoxetine (the antidepressant known as Prozac), an unrelated structure that has similar physical properties ( $pK_a$  and hydrophobicity) to GPN (Fig. 5A and Table S1).

As expected  $NH_4Cl$  and fluoxetine caused rapid and sustained increases in  $pH_{Iy}$  (Fig. 5B,C), but they also caused transient increases in  $pH_{cyt}$  and  $[Ca^{2+}]_c$ , similar to those evoked by GPN (Fig. 5D-K). Furthermore, the  $Ca^{2+}$  signals evoked by  $NH_4Cl$  and

fluoxetine, like those evoked by GPN and  $D$ -GPN, were abolished by pretreatment with thapsigargin (Fig. 5F-K). The increases in  $[Ca^{2+}]_c$  evoked by  $NH_4Cl$  and fluoxetine were similar in cells with and without  $IP_3Rs$  (Fig. S7A,B). By using carbachol or thapsigargin to estimate the residual  $Ca^{2+}$  content of the ER (through stimulation of  $IP_3$  formation or inhibition of SERCAs, respectively), we confirmed that both GPN and  $NH_4Cl$  caused a concentration-dependent decrease in the ER  $Ca^{2+}$  content (Fig. S7C,D). These results establish that four different weak bases (GPN,  $D$ -GPN,  $NH_4Cl$  and fluoxetine) have similar effects. Each causes a sustained increase in  $pH_{Iy}$ , and transient increases in  $pH_{cyt}$  and  $[Ca^{2+}]_c$ . The latter invariably requires  $Ca^{2+}$  within the ER, but requires neither  $IP_3Rs$  nor  $RyRs$ .

#### GPN stimulates $Ca^{2+}$ release from the ER by increasing $pH_{cyt}$

Since no known CICR mechanism contributes to the  $Ca^{2+}$  signals evoked by GPN (Figs 1F and 2, Fig. S5), the requirement for ER  $Ca^{2+}$  cannot arise from it amplifying an initial GPN-evoked  $Ca^{2+}$  release from lysosomes. However, we (Atakpa et al., 2018; López Sanjurjo et al., 2013) and others (Garrity et al., 2016) have suggested that the ER also contributes to  $Ca^{2+}$  uptake by lysosomes (Fig. 5L). We, therefore, considered whether the primary action of GPN is to trigger  $Ca^{2+}$  release from lysosomes, which might be attenuated when lysosomes can no longer acquire  $Ca^{2+}$  from ER (Fig. 5L, option 1). Evidence that  $IP_3$ -evoked  $Ca^{2+}$  release from the ER immediately attenuates responses to GPN (Fig. S4) argues against this proposal, and subsequent experiments confirm that it is untenable.

After dissipation of the lysosomal pH gradient by sustained treatment with bafilomycin  $A_1$ , the GPN-evoked increase in  $[Ca^{2+}]_c$  was exaggerated (Fig. 6A,B), just as responses to  $Ca^{2+}$  release from the ER through  $IP_3Rs$  or inhibition of SERCAs are exaggerated after treatment with bafilomycin  $A_1$  (Atakpa et al., 2018; López Sanjurjo et al., 2013). Similar results were obtained after lysis of lysosomes by pre-treatment with LLOMe, namely the increase in  $[Ca^{2+}]_c$  evoked by GPN was exaggerated (Fig. 6C,D). Hence, under conditions where GPN cannot cause an increase in  $pH_{Iy}$  and when

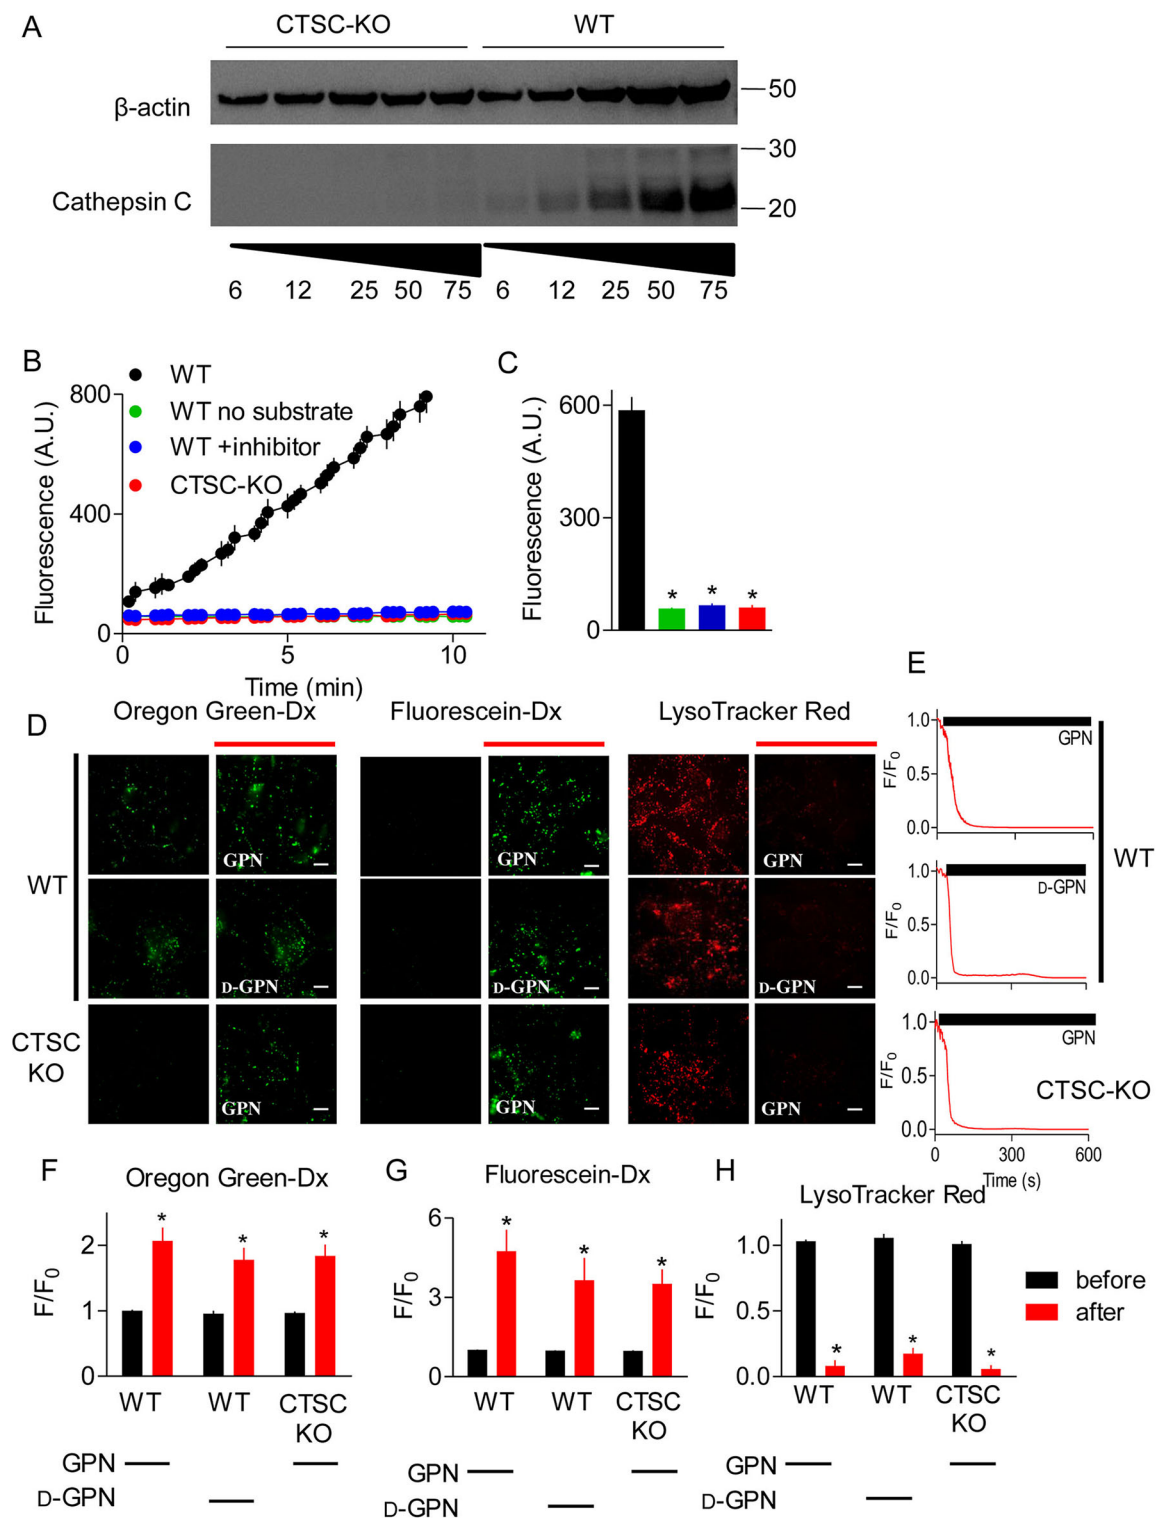

**Fig. 3. Effects of GPN on  $pH_y$  do not require cathepsin C.** (A) Western blot shows expression of cathepsin C and  $\beta$ -actin in wild-type (WT) HEK cells and after CRISPR/Cas9-mediated disruption of the cathepsin C genes (CTSC-KO). Protein loadings ( $\mu$ g) and positions of molecular mass markers (kDa) are shown. A representative for five similar blots is shown. (B) Cathepsin C activity, determined using a substrate (Gly-Arg-AMC) that fluoresces after proteolysis, was determined using whole-cell lysates from WT or CTSC-KO cells, alone or after treatment of cells with the cathepsin C inhibitor Gly-Phe-DMK (10  $\mu$ M, 72 h, 37°C). Results show mean $\pm$ s.d. for duplicate determinations. The green symbols are obscured by the overlying blue symbols. (C) Summary results (mean $\pm$ s.e.m.,  $n=3$ ) from analyses similar to those in panel B show fluorescence recorded after 7 min. \* $P<0.05$ , one-way ANOVA, with Tukey's multiple comparison test (see panel B for colour key). (D) Lysosomes of WT or CTSC-KO HEK cells were loaded with pH indicators by endocytosis of dextran conjugates (Oregon Green and fluorescein) or by incubation with LysoTracker Red (100 nM, 20 min). Fluorescence was recorded before or 200 s after addition of GPN or D-GPN (300  $\mu$ M each). Scale bars: 10  $\mu$ m. (E) Time courses of the changes in LysoTracker Red fluorescence ( $F/F_0$ ) after addition of GPN or D-GPN (solid bars) in WT and CTSC-KO cells. (F-H) Summary results (mean $\pm$ s.e.m.,  $n=5$ ) from analyses similar to those in panel E show the fluorescence changes ( $F/F_0$ ) before and 200 s after addition of the indicated GPN (300  $\mu$ M). \* $P<0.05$ , Student's  $t$ -test relative to before GPN-treatment.

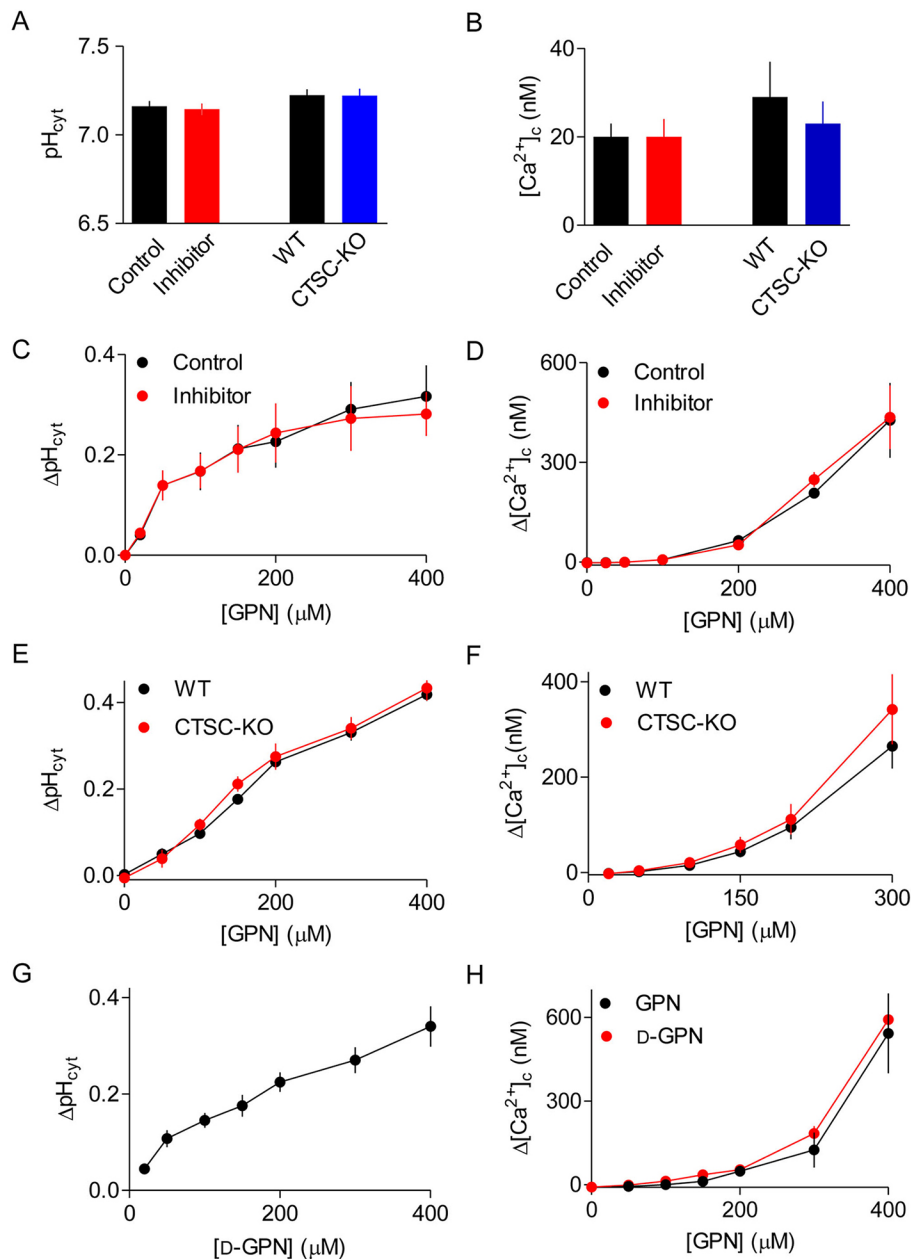

**Fig. 4. Effects of GPN on pH<sub>cyt</sub>, pH<sub>ly</sub> and [Ca<sup>2+</sup>]<sub>c</sub> do not require cathepsin C.** (A,B) Effects of the cathepsin C inhibitor Gly-Phe-DMK (10 μM, 72 h) and comparison of WT with CTSC-KO cells on pH<sub>cyt</sub> (A) and [Ca<sup>2+</sup>]<sub>c</sub> (B) of unstimulated HEK cells. Matched controls (Control or WT) are shown for each comparison (inhibitor or CTSC-KO). (C,D) Effects of the cathepsin C inhibitor (Gly-Phe-DMK, 10 μM, 72 h) on the changes in pH<sub>cyt</sub> (ΔpH<sub>cyt</sub>, measured 30 s after GPN addition) and the peak increase in [Ca<sup>2+</sup>]<sub>c</sub> (Δ[Ca<sup>2+</sup>]<sub>c</sub>) evoked by GPN. (E,F) Results of analyses similar to those shown in C,D, comparing the effects of GPN in WT and CTSC-KO cells. (G,H) Results of analyses similar to those shown in C,D, comparing the effects of GPN and D-GPN. Results (A-H) show means ± s.e.m., n=3, each with 3 replicates.

lysosomes are unable to accumulate Ca<sup>2+</sup> (Atakpa et al., 2018), GPN evokes larger increases in [Ca<sup>2+</sup>]<sub>c</sub>. We, therefore, considered whether the GPN-evoked increases in pH<sub>cyt</sub> directly stimulate Ca<sup>2+</sup> release from the ER (Fig. 5L2).

We loaded HEK cells with sodium propionate (NaP), a weak acid, to buffer changes in pH<sub>cyt</sub> evoked by GPN. NaP caused an initial drop in pH<sub>cyt</sub> that slowly recovered, and subsequent addition of GPN caused an attenuated increase in pH<sub>cyt</sub> (Fig. 6E). The immediate effect of GPN on pH<sub>cyt</sub> was only modestly attenuated by NaP, but after 2 min the response was reduced by >60% (Fig. 6F). NaP did not affect pH<sub>ly</sub> or prevent GPN from rapidly increasing pH<sub>ly</sub> (Fig. 6G,H). The GPN-evoked increase in [Ca<sup>2+</sup>]<sub>c</sub>, which takes 106 ± 2 s to reach its peak (Fig. 1G, Fig. S1C), was almost abolished by NaP (Fig. 6I,J). NaP had no effect on the increase in [Ca<sup>2+</sup>]<sub>c</sub> evoked by carbachol or the Ca<sup>2+</sup> content of the intracellular stores assessed by addition of ionomycin (Fig. 6K,L). These results demonstrate that an increase in pH<sub>cyt</sub> is required for GPN to increase [Ca<sup>2+</sup>]<sub>c</sub>, whereas an increase in pH<sub>ly</sub> is ineffective (Fig. 7).

## DISCUSSION

GPN is used extensively to perturb lysosomes and, as interest in the contributions of lysosomes to Ca<sup>2+</sup> signalling has grown, has been widely used to release Ca<sup>2+</sup> from lysosomes (see Introduction). It has been universally assumed that GPN achieves selectivity for lysosomes because its cleavage by the lysosomal enzyme cathepsin C causes osmotic stress that ruptures lysosomal membranes (Fig. 1A). Our results challenge these assumptions and demonstrate that GPN does not selectively target lysosomes.

We have shown that GPN does not acutely rupture lysosomes (Fig. 1B,C,K,L, Fig. S3) and that it causes a transient increase in pH<sub>cyt</sub> (Fig. 1I,J, Fig. S1E,F). GPN also increases pH<sub>ly</sub> and [Ca<sup>2+</sup>]<sub>c</sub>. None of these effects of GPN require cathepsin C (Figs 3 and 4). The GPN-evoked increase in [Ca<sup>2+</sup>]<sub>c</sub> is mediated by Ca<sup>2+</sup> release from the ER, without any evident involvement of lysosomes: Ca<sup>2+</sup> signals are abolished by depleting the ER of Ca<sup>2+</sup> (Figs 1D,F and 5F-K, Figs S4 and S5E), amplified when lysosomes are no longer acidified (Fig. 6A,B), and show no requirement for CICR from the ER (Figs 1F and 2, Fig. S5).

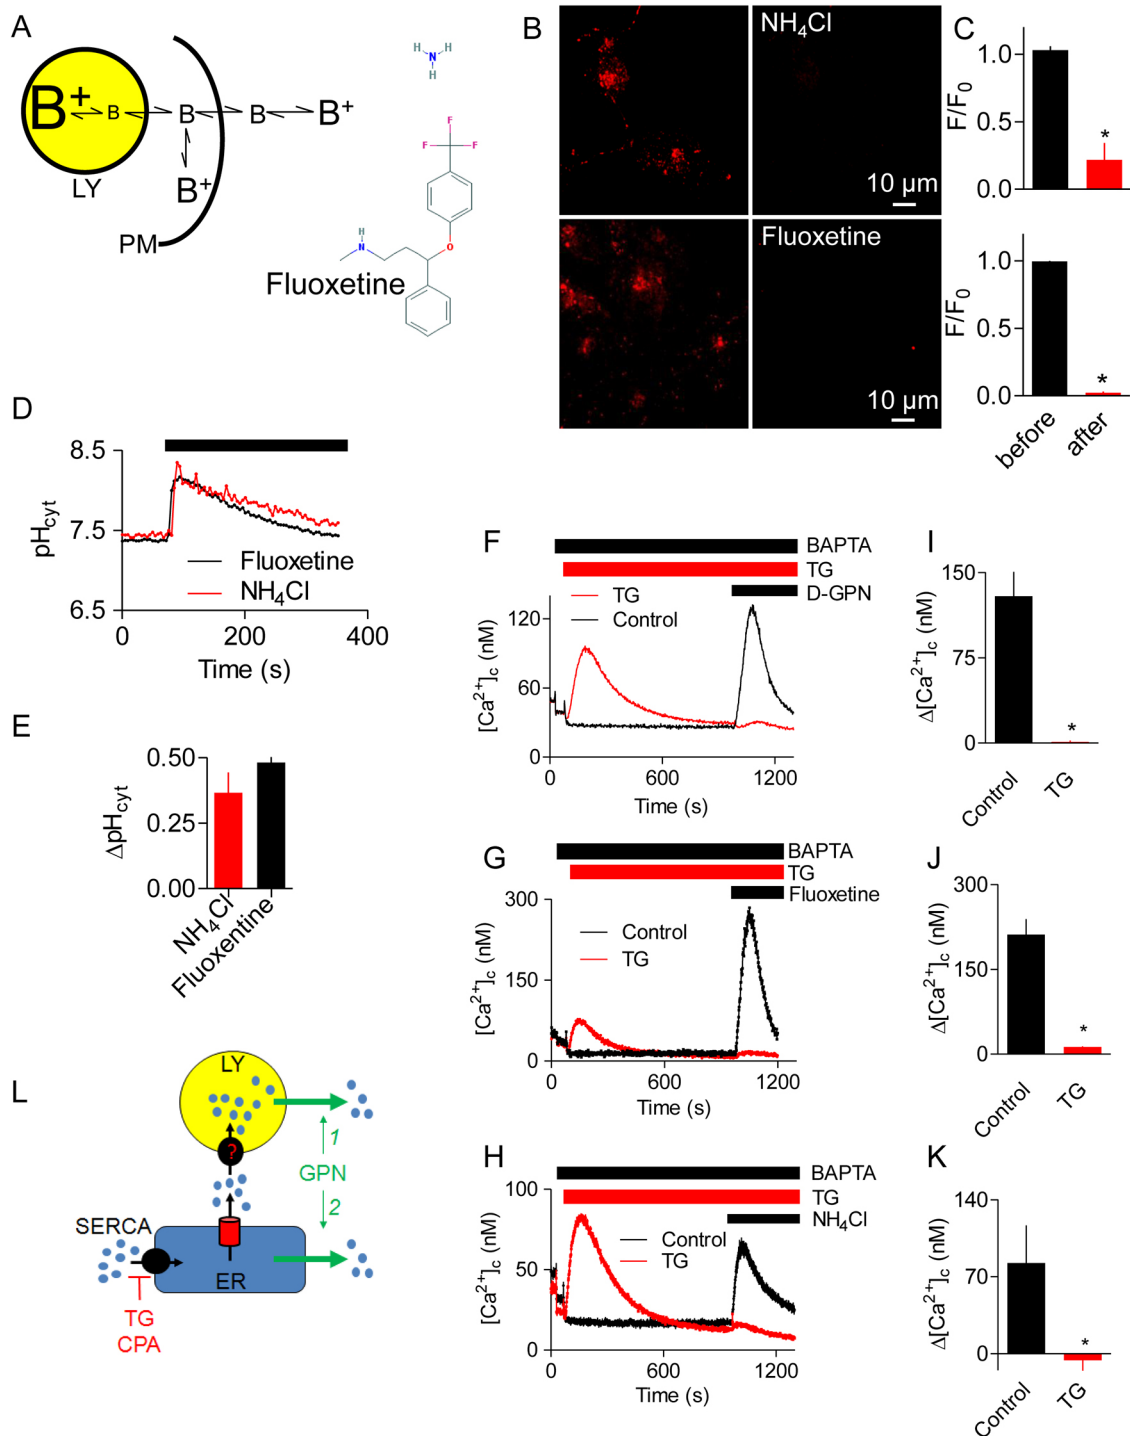

**Fig. 5. Other weak bases evoke ER-dependent Ca<sup>2+</sup> signals.** (A) Structures and mechanisms of action of some lysosomotropic drugs. (B) Confocal images of HEK cells loaded with LysoTracker Red (100 nM, 20 min) and then treated (200 s) with NH<sub>4</sub>Cl (20 mM) or fluoxetine (300 μM). (C) Quantification of fluorescence (F/F<sub>0</sub>) from images similar to those in panel B. Results show mean±s.e.m., n=7. F<sub>0</sub> and F are fluorescence recorded before and 200 s after the addition of NH<sub>4</sub>Cl or fluoxetine. (D) Effects of NH<sub>4</sub>Cl (20 mM) or fluoxetine (300 μM) on pH<sub>cyt</sub> recorded in populations of SNARF-5F-loaded HEK cells. Results show mean ±s.d. of n=3 determinations. (E) Summary results (mean±s.e.m., n=3, each with 3 replicates) show peak increases in pH<sub>cyt</sub> (ΔpH<sub>cyt</sub>). (F-H) Effects of thapsigargin (TG, 1 μM, 15 min) in Ca<sup>2+</sup>-free HBS on the Ca<sup>2+</sup> signals evoked by D-GPN (200 μM) (F), fluoxetine (300 μM) (G) or NH<sub>4</sub>Cl (20 mM) (H). Results show mean±s.d. of n=3 determinations. (I-K) Summary results from analyses similar to those in panels F-H show the effects of D-GPN (I), fluoxetine (J) or NH<sub>4</sub>Cl (K) on Δ[Ca<sup>2+</sup>]<sub>c</sub> alone or after treatment with thapsigargin (TG, 1 μM, 15 min). Results show mean±s.e.m., n=3, each with 3 replicates. (L) A requirement for ER Ca<sup>2+</sup> for GPN to evoke an increase in [Ca<sup>2+</sup>]<sub>c</sub> might reflect a need for the ER to fuel lysosomal Ca<sup>2+</sup> uptake (option 1) or a direct action of GPN on the ER (option 2).

Several lines of evidence show that the GPN-evoked increase in pH<sub>cyt</sub> stimulates Ca<sup>2+</sup> release from the ER (Fig. 7). Other membrane-permeant weak bases mimic GPN (Fig. 5, Fig. S7),

depletion of the ER of Ca<sup>2+</sup> abolishes the GPN-evoked increase in [Ca<sup>2+</sup>]<sub>c</sub> (Figs 1D-F and 5F-K, Figs S4 and S5E) without affecting the pH<sub>cyt</sub> increase (Fig. S11), and an increase in pH<sub>ly</sub> is not required

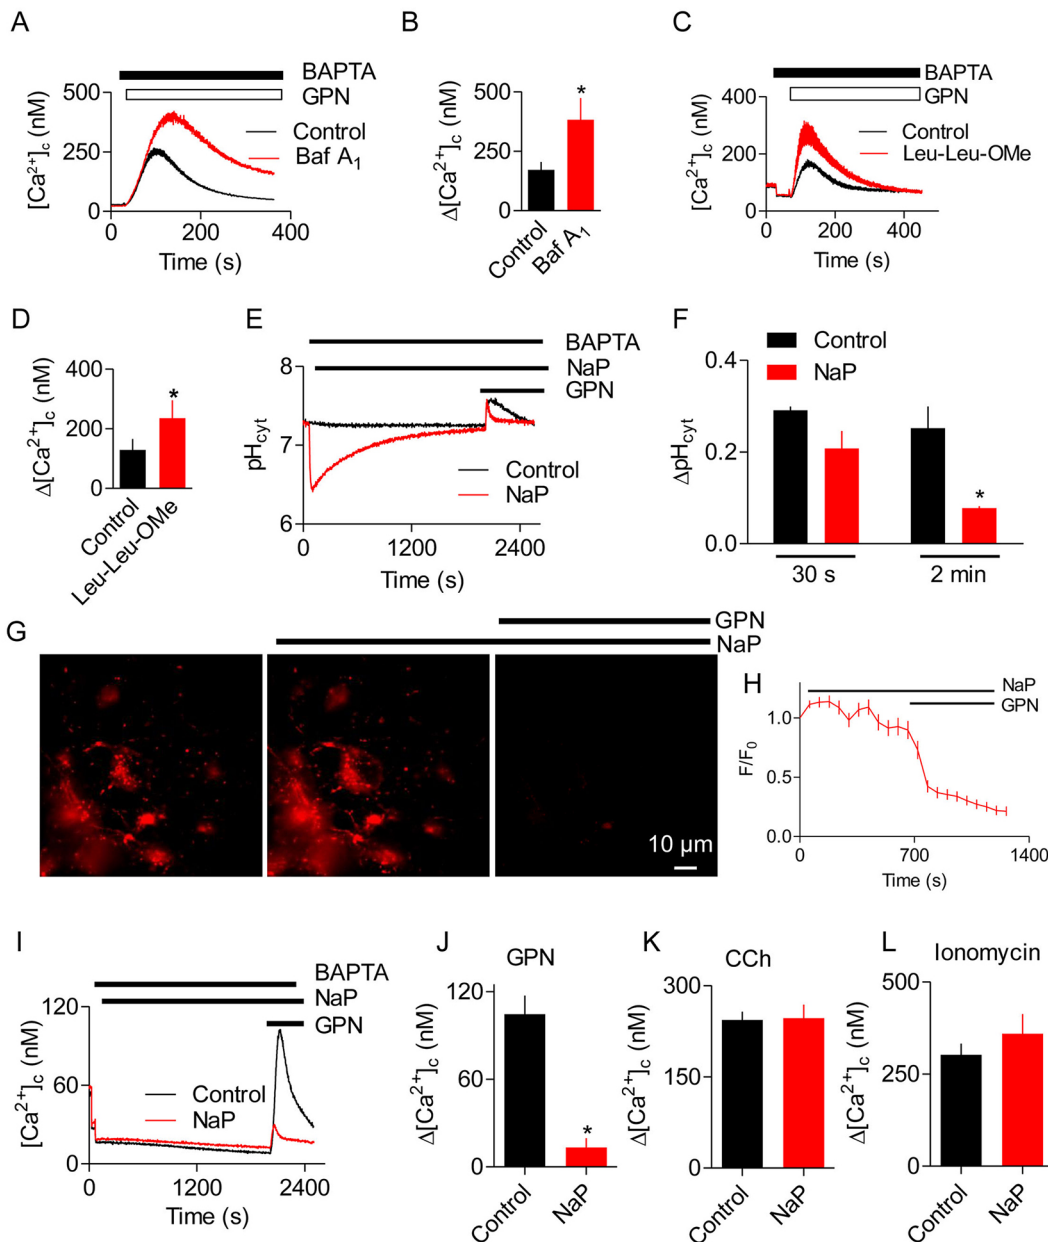

**Fig. 6. Buffering the GPN-evoked increase in pH<sub>cyt</sub> abolishes Ca<sup>2+</sup> release from the ER.** (A) Effects of bafilomycin A<sub>1</sub> (Baf A<sub>1</sub>, 1 μM, 1 h) on the Ca<sup>2+</sup> signals evoked by GPN (200 μM) in HEK cells in Ca<sup>2+</sup>-free HBS. Mean±s.d. of 3 replicates. (B) Summary results (mean±s.e.m., n=4, each with 3 replicates) from analyses similar to those in panel A show peak increases in [Ca<sup>2+</sup>]<sub>c</sub> evoked by GPN (Δ[Ca<sup>2+</sup>]<sub>c</sub>). \*P<0.05, Student's *t*-test. (C) Effects of pre-treating HEK cells with LLOMe (Leu-Leu-OMe; 1 mM, 1 h) on the Ca<sup>2+</sup> signals evoked by GPN (200 μM) in Ca<sup>2+</sup>-free HBS. Mean±s.d. of 3 replicates. (D) Summary results (mean±s.e.m., n=4, each with 3 replicates) from analyses similar to those in panel C show peak increases in [Ca<sup>2+</sup>]<sub>c</sub> evoked by GPN (Δ[Ca<sup>2+</sup>]<sub>c</sub>). \*P<0.05, Student's *t*-test. (E) HEK cells in Ca<sup>2+</sup>-free HBS were treated with sodium propionate (NaP, 30 mM) before addition of GPN (200 μM). Results show pH<sub>cyt</sub> (mean of 3 replicates). (F) Summary results (mean±s.e.m., n=3, each with 3 replicates) from analyses similar to those in panel E show pH<sub>cyt</sub> measured 30 s or 2 min after GPN addition. \*P<0.05, Student's *t*-test. (G) Typical images of HEK cells showing the effects of NaP (30 mM, 30 min) and then GPN (200 μM, 30 s) on LysoTracker Red staining. (H) Time-course (mean±s.d., n=3 cells). (I) Analysis of the effects of NaP and GPN on [Ca<sup>2+</sup>]<sub>c</sub> (mean of 3 replicates). (J-L) Summary results [mean±s.e.m., n=4 (J) or n=3 (K,L), each with 3 replicates] from analyses similar to those in panel E show peak Ca<sup>2+</sup> signals (Δ[Ca<sup>2+</sup>]<sub>c</sub>) evoked by GPN (200 μM), carbachol (CCh, 1 mM) or ionomycin (5 μM) in Ca<sup>2+</sup>-free HBS. \*P<0.05, Student's *t*-test.

for GPN to release Ca<sup>2+</sup> (Fig. 6A,B). Furthermore, rupture of lysosomes with LLOMe exaggerates, rather than prevents, cytosolic Ca<sup>2+</sup> signals evoked by GPN (Fig. 6C,D, Fig. S6). Finally, GPN-evoked Ca<sup>2+</sup> release is almost abolished when the pH<sub>cyt</sub> changes are buffered under conditions where GPN still causes an increase in pH<sub>cyt</sub> (Fig. 6). We conclude that GPN, and other membrane-permeant weak bases, cause an increase in pH<sub>cyt</sub>, which then stimulates Ca<sup>2+</sup> release from the ER (Fig. 7).

Cells tightly control their pH<sub>cyt</sub>, passively with buffers and actively by means of ion transporters (Casey et al., 2010), but many stimuli cause acute increases in pH<sub>cyt</sub> at least as large as those evoked by GPN (ΔpH=0.37±0.06, Fig. 1H). The stimuli include those that activate the plasma membrane Na<sup>+</sup>-H<sup>+</sup> exchanger (NHE) through protein kinase C (Wakabayashi et al., 2006) and signals that prepare sperm for fertilisation (Babcock et al., 1983). Furthermore, in tumours, pH<sub>cyt</sub> is often increased



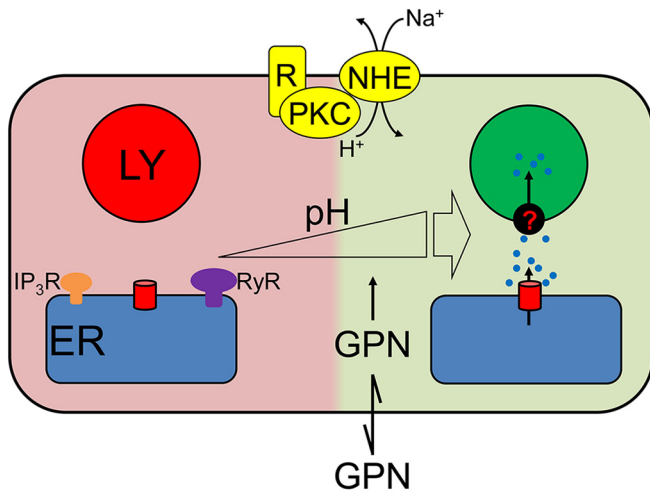

**Fig. 7. GPN evokes Ca<sup>2+</sup> release from the ER through an increase in pH<sub>cyt</sub>.** GPN, a weak membrane-permeant base, causes pH<sub>cyt</sub> to transiently increase which directly stimulates Ca<sup>2+</sup> release from the ER through a mechanism that requires neither IP<sub>3</sub>Rs nor RyRs. Some of the Ca<sup>2+</sup> released by this pH-regulated mechanism, similarly to Ca<sup>2+</sup> released by IP<sub>3</sub>Rs, is then accumulated by lysosomes (LY). Many physiological stimuli that increase pH<sub>cyt</sub>, including those that stimulate the Na<sup>+</sup>/H<sup>+</sup> antiporter (NHE) through protein kinase C (PKC), evoke increases in [Ca<sup>2+</sup>]<sub>c</sub> through the same pathway.

(Schreiber, 2005). In many cell types, an increase in pH<sub>cyt</sub> increases [Ca<sup>2+</sup>]<sub>c</sub>. In some cells, the response requires Ca<sup>2+</sup> entry (Grinstein and Goetz, 1985; Wakabayashi et al., 2006) but in many others it is due to Ca<sup>2+</sup> release from intracellular stores, most likely the ER (Batlle et al., 1993; Shorte et al., 1991; Siskind et al., 1989; Speake and Elliott, 1998; Willoughby et al., 2001; Yodozawa et al., 1997). The mechanisms are unknown and, since the pH of the ER lumen (pH<sub>ER</sub>) is assumed to equilibrate rapidly with pH<sub>cyt</sub> (Casey et al., 2010), the effect might be exercised from the cytosol or ER lumen. Because increased pH<sub>ER</sub> would be expected to increase Ca<sup>2+</sup> buffering and so decrease ER luminal free [Ca<sup>2+</sup>], the Ca<sup>2+</sup> release evoked by increased pH<sub>cyt</sub> is probably due to the opening of a Ca<sup>2+</sup>-permeable ER channel. At increased pH<sub>cyt</sub>, phospholipase C may be stimulated (Yodozawa et al., 1997) and IP<sub>3</sub> also binds more tightly to IP<sub>3</sub>Rs (Joseph et al., 1989), but GPN-evoked Ca<sup>2+</sup> release does not require IP<sub>3</sub>Rs (Fig. 1F, Fig. S5E). SERCAs, which transport Ca<sup>2+</sup> in exchange for H<sup>+</sup>, are inhibited by increased pH (Li et al., 2012; Lytton et al., 1992). However, inhibition of SERCAs cannot explain our results because the Ca<sup>2+</sup> release evoked by GPN was both faster and more substantial than that evoked by inhibition of SERCAs by CPA or thapsigargin (Fig. 1D,G, Fig. S1D). Hence, modest increases in pH<sub>cyt</sub> similar to those evoked by many physiological stimuli, trigger a substantial Ca<sup>2+</sup> release from the ER that requires neither RyRs nor IP<sub>3</sub>Rs.

We conclude that GPN does not, as hitherto supposed, evoke Ca<sup>2+</sup> release from lysosomes through its cathepsin C-mediated proteolysis. Instead, GPN, in common with other membrane-permeant weak bases and many physiological stimuli, transiently increases pH<sub>cyt</sub>, and that directly stimulates Ca<sup>2+</sup> release from the ER by a mechanism that is independent of known ER Ca<sup>2+</sup> release channels.

## MATERIALS AND METHODS

### Materials

SNARF-5F, dextran-conjugates of Oregon Green 488 (*M<sub>r</sub>* 10,000), Alexa Fluor-488 (*M<sub>r</sub>* 10,000 and 3000) or fluorescein (*M<sub>r</sub>* 3000), LysoTracker Red DND-99, Lucifer Yellow, Platinum Pfx DNA polymerase, Tris-acetate

SDS running buffer, 4–12% Bis-Tris polyacrylamide gels, iBLOT transfer kit, custom primers, EDTA-free Pierce protease inhibitor mini-tablets, Rapid DNA ligation kit, and Spectra multicolour broad range protein ladder were from ThermoFisher (Waltham, MA). Glycyl-L-phenylalanine 2-naphthylamide (GPN) was from Bachem (St. Helens, UK) and Santa Cruz Biotechnology (Dallas, TX); most experiments used GPN from Bachem (see Fig. S1E,F). Glycyl-D-phenylalanine 2-naphthylamide (D-GPN) was custom-synthesised by LifeTein (Somerset, NJ). Gly-Arg-7-amino-4-methylcoumarin (Gly-Arg-AMC) was from Bachem. Gly-Phe-diazomethylketone (Gly-Phe-DMK) was from MP Bio (Derby, UK). Fibronectin was from Merck Millipore (Watford, UK). ECL prime western blotting detection reagent was from GE Life Sciences (Little Chalfont, UK). Thapsigargin and cyclopiazonic acid (CPA) were from Bio-Techne (Minneapolis, MN). Fluo 8-AM was from Stratech Scientific (Suffolk, UK). 1,2-bis(O-aminophenoxy)ethane-N,N,N',N'-tetraacetic acid (BAPTA) was from Phion (Dorset, UK). Ionomycin was from Apollo Scientific (Stockport, UK). Ryanodine, Pluronic F-127, sodium propionate (NaP), fluoxetine hydrochloride, Leu-Leu methyl ester hydrobromide (Leu-Leu-OMe) and carbamylcholine chloride (carbachol, CCh) were from Sigma (Dorset, UK).

### Cell culture

HEK and HeLa cell lines were cultured in Dulbecco's modified Eagle's medium (DMEM)/F-12 with GlutaMAX (ThermoFisher) supplemented with foetal bovine serum (FBS, 10%, Sigma) at 37°C in humidified air with 5% CO<sub>2</sub>. HEK cells lacking all IP<sub>3</sub>R subtypes (HEK-IP<sub>3</sub>R-KO) were from Kerafast (Boston, MA) (Alzayady et al., 2016). HAP1 cells, genetically engineered using CRISPR/Cas9 to disrupt genes for all three IP<sub>3</sub>R subtypes, were developed with Horizon Discovery (Cambridge, UK) (Atakpa et al., 2018). HAP1 cells were cultured in Iscove's modified Dulbecco's medium (IMDM) GlutaMAX (ThermoFisher) with 10% FBS. The cells were maintained at 37°C in humidified air with 5% CO<sub>2</sub>. Cells were passaged every 3–4 days using Gibco TrypLE Express (ThermoFisher). All cell lines were confirmed to be free of mycoplasma.

For imaging, cells were grown on glass-bottomed dishes (35-mm with a 7-mm No. 0 glass insert, MatTek Corporation, Ashland, MA) coated with human fibronectin (10 μg/ml). BacMam baculovirus encoding human M<sub>3</sub> muscarinic acetylcholine receptors (M<sub>3</sub>Rs) was produced as described (Taylor et al., 2017). HEK cells were infected at a multiplicity of infection (MOI) of ~50 and used after 48 h (Fig. S4).

### Generation of HEK cells without cathepsin C

CRISPR/Cas9 was used to disrupt the genes encoding cathepsin C (CTSC). Guide sequences were selected using E-crispr.org (Heigwer et al., 2014) and zitfit.partners.org (Sander et al., 2010). Oligonucleotides encoding four different guide RNAs (sgRNA) were used to target the first, second and third exons of CTSC (sgRNAs for exon 1: 5'-GCTGGGCACC-TGGGTCTCC-3' and 5'-GCCCTCCTGCTGCTTCTCTC-3'; sgRNA for exon 2: GATACAGCATATGATGACCT-3'; sgRNAs for exon 3: 5'-GTTGACATACACATTCTCAG-3'). Each guide and its complementary sequence had a sticky end (5'-CACC-3' or 5'-AAAC-3') to allow ligation into the Px458 vector, which also encodes Cas9 nuclease and GFP (Addgene #48138) (Ran et al., 2013). The coding sequences of the four final plasmids were verified. HEK cells were transfected with pX458-sgRNAs using Trans LT1 (4 μg DNA per 6-well plate). After 48 h, EGFP-expressing cells were sorted as single cells into 96-well plates by fluorescence-activated cell sorting (FACS). After 8 weeks, clones were screened by western blotting. The HEK-CTSC-KO cells express no detectable cathepsin C activity (Fig. 3A-C).

### Generation of HEK cells deficient in TMCO1

The methods used to generate cells deficient in TMCO1 were the same as those used to generate HEK-CTSC-KO cells. The only effective sgRNA (5'-GAAGCGGAAGTGCGATCTTC-3') targeted exon 1. Neither different sgRNAs, targeting exon 1 (5'-GTGCACGGCTCTGCTCGCAG-3') or exon 3 (5'-GAAACAATAACAGAGTCAGC-3' and 5'-GTTTACAGTGGAA-AAGAAGA-3'), nor repeated transfections with multiple sgRNAs succeeded in yielding cells with both TMCO1 alleles disrupted (Fig. 2).

### Measurements of pH<sub>cyt</sub> in cell populations

Confluent cultures of cells grown in 96-well plates (Greiner Bio-One, Storehouse, UK) were loaded with the ratiometric pH indicator SNARF-5F (Liu et al., 2001) by incubation (30 min, 20°C) with SNARF-5F AM (2 μM, 30 min) in HEPES-buffered saline (HBS) containing Pluronic F-127 (0.02%). HBS had the following composition: 135 mM NaCl, 5.9 mM KCl, 1.2 mM MgCl<sub>2</sub>, 1.5 mM CaCl<sub>2</sub>, 11.5 mM glucose, 11.6 mM HEPES pH 7.3. Cells were washed in HBS, and fluorescence was recorded from cells in HBS at 20°C at intervals of 3.8 s (excitation, 543 nm; emission, 580 and 640 nm) using a FlexStation 3 fluorescence plate-reader with SoftMaxPro software (MDS Analytical Technologies, Wokingham, UK). Fluorescence was calibrated to pH<sub>cyt</sub> from

$$\text{pH}_{\text{cyt}} = \text{p}K_a - \log \left[ \frac{(R - R_b)}{(R_a - R)} \times \frac{F_b}{F_a} \right],$$

where, pK<sub>a</sub> is the negative log of the acid-base dissociation constant (K<sub>a</sub>); R is the fluorescence emission ratio (F<sub>580</sub>:F<sub>640</sub>); R<sub>a</sub> (F<sub>a</sub>) and R<sub>b</sub> (F<sub>b</sub>) are the fluorescence ratios (or fluorescence intensities at 640 nm) for the fully protonated and de-protonated forms of the indicator.

To determine the pK<sub>a</sub> of SNARF-5F, cells loaded with SNARF-5F were treated for 30 min in Ca<sup>2+</sup>-free cytosol-like medium (CLM pH 7.4) with the H<sup>+</sup>/K<sup>+</sup> antiporter nigericin (50 μM). CLM was then replaced by CLM supplemented with nigericin (50 μM) and buffered at different pH values (pH 5.0–8.5), and SNARF-5F fluorescence was measured. Ca<sup>2+</sup>-free CLM had the following composition: KCl 140 mM, NaCl 4 mM, MgCl<sub>2</sub> 1.4 mM, HEPES 10 mM, EGTA 1 mM. The resulting calibration plot of pH versus  $\log \left( \frac{F_b^{640}}{F_a^{640}} \times \frac{(R - R_b)}{(R_a - R)} \right)$  had a slope of ~1 and the intercept was the pK<sub>a</sub> (7.09) used in all further calibrations.

### Measurements of [Ca<sup>2+</sup>]<sub>c</sub> in cell populations

For measurements of cytosolic free [Ca<sup>2+</sup>]<sub>c</sub> ([Ca<sup>2+</sup>]<sub>c</sub>), confluent cell monolayers grown in 96-well plates were loaded with fluo 8 by incubation for 1 h at 20°C in HBS (100 μl) containing fluo 8-AM and 0.02% Pluronic F-127. Cells were then washed and incubated in HBS for 1 h at 20°C before use. CaCl<sub>2</sub> was omitted from nominally Ca<sup>2+</sup>-free HBS, and in some experiments (see figure legends) BAPTA (final concentration 2.5 mM) was added to the HBS immediately before stimulation to reduce the free [Ca<sup>2+</sup>]<sub>c</sub> of the HBS to <20 nM. Fluorescence was recorded using a FlexStation 3 fluorescence plate-reader. Fluorescence was recorded at 1.44-s intervals, with excitation at 485 nm and emission at 525 nm. Data were collected and analyzed using SoftMax Pro software. Maximal (F<sub>max</sub>) and minimal (F<sub>min</sub>) fluorescence values were determined from parallel wells after addition of Triton X-100 (0.1%) with either 10 mM CaCl<sub>2</sub> (F<sub>max</sub>) or 10 mM BAPTA (F<sub>min</sub>). Fluorescence values (F) were calibrated to [Ca<sup>2+</sup>]<sub>c</sub> using a K<sub>D</sub>=389 nM (fluo 8) from

$$[\text{Ca}^{2+}]_c = K_D \times \frac{(F - F_{\text{min}})}{(F_{\text{max}} - F)}.$$

### Loading lysosomes with fluorescent indicators

To load lysosomes by endocytosis with fluorescent dyes, cells grown on poly-L-lysine-coated, glass-bottomed 35-mm dishes were incubated (16 h, 37°C) in culture medium supplemented with either a dextran-conjugated indicator (0.1 mg/ml) or Lucifer Yellow (0.2 mg/ml). After a further 4–6 h in the same medium without indicator, cells were used for experiments. For HEK cells expressing LAMP1-mCherry (Fig. S3) (López Sanjurjo et al., 2013), confluent cells were transfected using TransIT-LT1 reagent (2.5 μg DNA in 7.5 μl reagent per 35-mm dish; GeneFlow, Lichfield, UK) at the same time as they were loaded with dextran-conjugated Alexa Fluor 488 (M<sub>r</sub> ~10,000). For labelling with LysoTracker Red, cells were incubated in HBS with LysoTracker Red DND-99 (100 nM, 20°C). After 20 min, cells were washed three times with HBS and used immediately.

### Fluorescence microscopy

Fluorescence microscopy used inverted Olympus IX83 microscopes with 100× objectives (numerical aperture, NA 1.45 or 1.49), a multi-line laser

bank (488 and 561 nm) and an iLas<sup>2</sup> targeted laser illumination system (Cairn, Faversham, UK). Excitation light was transmitted through a quad dichroic beam-splitter (TRF89902-QUAD), and emitted light was passed through appropriate filters (Cairn Optospin). Wide-field images were collected with either an iXon Ultra 897 EMCCD camera (Andor, Belfast, Northern Ireland) or a 95B Scientific CMOS camera (Photometrics, Tucson, AZ, USA) and MetaMorph microscopy automation and image analysis software (Molecular Devices). Bright-field images were acquired using a Cairn MonoLED illuminator.

Fluorescence from Oregon Green, fluorescein and Alexa Fluor 488 was excited at 488 nm and captured using a 525/50-nm filter (peak/bandwidth). LysoTracker Red and mCherry were excited at 561 nm and captured at 630/75 nm. All fluorescence images were corrected for background by subtraction of fluorescence from a region outside the cell.

### Analysis of fluorescence images

Time-lapse recordings of cells loaded with dextran-conjugated indicators were analyzed by taking randomly selected regions of interest (ROI) large enough for each to include several lysosomes (ROI, 3.2 μm×3.2 μm). Fluorescence changes were then expressed as F/F<sub>0</sub>, where F<sub>0</sub> and F denote the average fluorescence within the ROI at the start of the experiment (F<sub>0</sub>) and at each subsequent time point (F).

To analyse the number of lysosomes in cells before and after GPN treatment (Fig. 1L), the Fiji TrackMate plugin (Tinevez et al., 2017) was used to identify lysosomes as spots in background-corrected wide-field images.

For analysis of Alexa Fluor 488-dextran distribution in cells expressing LAMP1-mCherry, the FFT bandpass filter and thresholding functions in Fiji (Schindelin et al., 2012) were used to generate a binary image to identify ROIs expressing LAMP1-mCherry (10–1000 pixels with a circularity of 0.1–1). Within the identified ROIs, the background-corrected fluorescence images for LAMP1-mCherry and Alexa Fluor 488 were used to compute a fluorescence ratio for each ROI (F<sub>488</sub>:F<sub>561</sub>). The F<sub>488</sub>:F<sub>561</sub> values for all ROIs within each cell (typically 70–270, but ranging from 33–486) were averaged for each image, and then expressed relative to the value determined before treatment (Fig. S3). This averaging within a cell was required because lysosomes move during the 25-min recording interval, making it impossible to track individual ROIs in recordings that were collected at 5-min intervals (to minimise photobleaching).

### Western blots

Cells in 6-well plates were washed, lysed in RIPA buffer (30 μl, 4°C, 1 h) by using a syringe needle and sonication, and the supernatant (14,000 g, 15 min, 4°C) was used for analysis.

RIPA buffer comprised: 150 mM NaCl, 1% Triton X-100, 0.5% sodium deoxycholate, 0.1% SDS, 50 mM Tris pH 8. Protein samples were separated on 4–12% Bis-Tris PAGE gels, transferred to a polyvinylidene difluoride (PVDF) membrane using an iBLOT system, and blocked by incubation in TBST with gentle shaking (1 h, 20°C). Tris-buffered saline (TBS) comprised: 150 mM NaCl, 50 mM Tris pH 7.5. For TBST, TBS was supplemented with 0.1% Tween-20 and 5% BSA. The membrane was washed with TBST, incubated with primary antibody (16 h, 40°C), washed with TBST (3×5 min, 20°C), incubated with HRP-conjugated secondary antibody in TBST with 1% BSA (1 h, 20°C), and washed with TBST (3×5 min, 20°C). Enhanced chemiluminescence (ECL) primer western blotting detection reagent (Amersham, UK) and a Syngene PXi chemiluminescence detection system were used to detect HRP. The antibodies used were mouse anti-cathepsin C (Santa Cruz Inc., Cat# s74590, 1:500), rabbit anti-TMCO1 (Sigma, Cat# AV49429, 1:1000), mouse anti β-actin (Cell Signaling, Cat# 8H10D10, 1:1000), donkey anti-mouse IgG-HRP (Santa Cruz Inc., Cat# sc-2314, 1:2000) and donkey anti-rabbit IgG-HRP (Santa Cruz Inc., Cat# sc-2313, 1:5000).

### Measurement of cathepsin C activity

Cathepsin C activity was measured by using a substrate, Gly-Arg-AMC, that becomes fluorescent after its proteolytic cleavage (Eick et al., 2014; Hamilton et al., 2008). HEK cell lysates were diluted in assay buffer (25 mM MES, 50 mM NaCl, 5 mM DTT, pH 6) to provide a protein concentration of 200 μg/ml, and distributed into 96-well plates (50 μl/well). Cleavage of Gly-

Arg-AMC (50  $\mu$ M) was monitored at 0.2-min intervals (excitation, 380 nm; emission 460 nm) using a FlexStation 3 plate-reader and SoftMax Pro software. A substrate blank was included as a control.

### Statistical analysis

Results are presented as means $\pm$ s.e.m. or  $\pm$ s.d., with  $n$  describing the number of independent analyses. Student's  $t$ -test, one-way or two-way ANOVA with Tukey's or Bonferroni test were used to determine statistical significance.  $P < 0.05$  was considered statistically significant.

### Competing interests

The authors declare no competing or financial interests.

### Author contributions

Conceptualization: P.A., M.A.-S., C.W.T.; Methodology: P.A., L.M.v.M., M.A.-S., S.C.; Formal analysis: P.A., L.M.v.M., M.A.-S., S.C., C.W.T.; Investigation: P.A.; Writing - original draft: P.A., C.W.T.; Writing - review & editing: P.A., L.M.v.M., M.A., C.W.T.; Supervision: C.W.T.; Project administration: P.A., C.W.T.; Funding acquisition: P.A., L.M.v.M., C.W.T.

### Funding

This work was supported by the Wellcome Trust (grant number: 101888 to C.W.T.), Biotechnology and Biological Sciences Research Council, UK (grant number: BB/P005330/1 to C.W.T.) and studentships from the Cambridge Commonwealth, European and International Trust (to P.A.) and the Herchel-Smith Fund (to L.M.v.M.). Deposited in PMC for immediate release.

### Supplementary information

Supplementary information available online at <http://jcs.biologists.org/lookup/doi/10.1242/jcs.223883.supplemental>

### References

- Alzayady, K. J., Wang, L., Chandrasekhar, R., Wagner, L. E., II, Van Petegem, F. and Yule, D. I. (2016). Defining the stoichiometry of inositol 1,4,5-trisphosphate binding required to initiate  $\text{Ca}^{2+}$  release. *Sci. Signal* **9**, ra35.
- Atakpa, P., Thillaiappan, N. B., Mataragka, S., Prole, D. L. and Taylor, C. W. (2018).  $\text{IP}_3$  receptors associate with ER-lysosome contact sites and selectively deliver  $\text{Ca}^{2+}$  to lysosomes. *Cell Rep* **25**, 3180-3193.
- Babcock, D. F., Rufo, G. A., Jr and Lardy, H. A. (1983). Potassium-dependent increases in cytosolic pH stimulate metabolism and motility of mammalian sperm. *Proc. Natl. Acad. Sci. USA* **80**, 1327-1331.
- Bagshaw, R. D., Mahuran, D. J. and Callahan, J. W. (2005). A proteomic analysis of lysosomal integral membrane proteins reveals the diverse composition of the organelle. *Mol. Cell. Proteomics* **4**, 133-143.
- Battle, D. C., Peces, R., LaPointe, M. S., Ye, M. and Daugirdas, J. T. (1993). Cytosolic free calcium regulation in response to acute changes in intracellular pH in vascular smooth muscle. *Am. J. Physiol.* **264**, C932-C943.
- Berg, T. O., Strømhaug, P. E., Løvdal, T., Seglen, P. O. and Berg, T. (1994). Use of glycyl-L-phenylalanine 2-naphthylamide, a lysosome-disrupting cathepsin C substrate, to distinguish between lysosomes and prelysosomal endocytic vacuoles. *Biochem. J.* **300**, 229-236.
- Casey, J. R., Grinstein, S. and Orlowski, J. (2010). Sensors and regulators of intracellular pH. *Nat. Rev. Mol. Cell Biol.* **11**, 50-61.
- Chapel, A., Kieffer-Jaquinod, S., Sagné, C., Verdon, Q., Ivaldi, C., Mellal, M., Thirion, J., Jadot, M., Bruley, C., Garin, J. et al. (2013). An extended proteome map of the lysosomal membrane reveals novel potential transporters. *Mol. Cell. Proteomics* **12**, 1572-1588.
- Churchill, G. C., Okada, Y., Thomas, J. M., Genazzani, A. A., Patel, S. and Galione, A. (2002). NAADP mobilizes  $\text{Ca}^{2+}$  from reserve granules, lysosome-related organelles, in sea urchin eggs. *Cell* **111**, 703-708.
- Coen, K., Flannagan, R. S., Baron, S., Carraro-Lacroix, L. R., Wang, D., Vermeire, W., Michiels, C., Munk, S., Baert, V., Sugita, S. et al. (2012). Lysosomal calcium homeostasis defects, not proton pump defects, cause endo-lysosomal dysfunction in PSEN-deficient cells. *J. Cell Biol.* **198**, 23-35.
- Davis, L. C., Morgan, A. J., Chen, J.-L., Snead, C. M., Bloor-Young, D., Shenderov, E., Stanton-Humphreys, M. N., Conway, S. J., Churchill, G. C., Parrington, J. et al. (2012). NAADP activates two-pore channels on T cell cytolytic granules to stimulate exocytosis and killing. *Curr. Biol.* **22**, 2331-2337.
- Dionisio, N., Albarrán, L., López, J. J., Berna-Erro, A., Salido, G. M., Bobe, R. and Rosado, J. A. (2011). Acidic NAADP-releasable  $\text{Ca}^{2+}$  compartments in the megakaryoblastic cell line MEG01. *Biochim. Biophys. Acta* **1813**, 1483-1494.
- Drose, S. and Altendorf, K. (1997). Bafilomycins and concanamycins as inhibitors of V-ATPases and P-ATPases. *J. Exp. Biol.* **200**, 1-8.
- Eick, S., Puklo, M., Adamowicz, K., Kantyka, T., Hiemstra, P., Stennicke, H., Guentsch, A., Schacher, B., Eichholz, P. and Potempa, J. (2014). Lack of cathelicidin processing in Papillon-Lefèvre syndrome patients reveals essential role of LL-37 in periodontal homeostasis. *Orphanet J. Rare Dis.* **9**, 148.
- Fois, G., Hobi, N., Felder, E., Ziegler, A., Miklavc, P., Walther, P., Radermacher, P., Haller, T. and Dietl, P. (2015). A new role for an old drug: ambroxol triggers lysosomal exocytosis via pH-dependent  $\text{Ca}^{2+}$  release from acidic  $\text{Ca}^{2+}$  stores. *Cell Calcium* **58**, 628-637.
- Garrity, A. G., Wang, W., Collier, C. M. D., Levey, S. A., Gao, Q. and Xu, H. (2016). The endoplasmic reticulum, not the pH gradient, drives calcium refilling of lysosomes. *eLife* **5**, e15887.
- Grinstein, S. and Goetz, J. D. (1985). Control of free cytoplasmic calcium by intracellular pH in rat lymphocytes. *Biochim. Biophys. Acta* **819**, 267-270.
- Haller, T., Dietl, P., Deetjen, P. and Völkl, H. (1996). The lysosomal compartment as intracellular calcium store in MDCK cells: a possible involvement in  $\text{InsP}_3$ -mediated  $\text{Ca}^{2+}$  release. *Cell Calcium* **19**, 157-165.
- Hamilton, G., Colbert, J. D., Schuettelkopf, A. W. and Watts, C. (2008). Cystatin F is a cathepsin C-directed protease inhibitor regulated by proteolysis. *EMBO J.* **27**, 499-508.
- Heigwer, F., Kerr, G. and Boutros, M. (2014). E-CRISP: fast CRISPR target site identification. *Nat. Methods* **11**, 122-123.
- Jadot, M., Biélande, V., Beauvoys, V., Wattiaux-De Coninck, S. and Wattiaux, R. (1990). Cytotoxicity and effect of glycyl-D-phenylalanine-2-naphthylamide on lysosomes. *Biochim. Biophys. Acta* **1027**, 205-209.
- Johnson, D. E., Ostrowski, P., Jaumouillé, V. and Grinstein, S. (2016). The position of lysosomes within the cell determines their luminal pH. *J. Cell Biol.* **212**, 677-692.
- Joseph, S. K., Rice, H. L. and Williamson, J. R. (1989). The effect of external calcium and pH on inositol trisphosphate-mediated calcium release from cerebellum microsomal fractions. *Biochem. J.* **258**, 261-265.
- Kilpatrick, B. S., Eden, E. R., Schapira, A. H., Futter, C. E. and Patel, S. (2013). Direct mobilisation of lysosomal  $\text{Ca}^{2+}$  triggers complex  $\text{Ca}^{2+}$  signals. *J. Cell Sci.* **126**, 60-66.
- Li, S., Hao, B., Lu, Y., Yu, P., Lee, H.-C. and Yue, J. (2012). Intracellular alkalization induces cytosolic  $\text{Ca}^{2+}$  increases by inhibiting sarco/endoplasmic reticulum  $\text{Ca}^{2+}$ -ATPase (SERCA). *PLoS ONE* **7**, e31905.
- Liu, J., Diwu, Z. and Leung, W.-Y. (2001). Synthesis and photophysical properties of new fluorinated benzo[c]xanthene dyes as intracellular pH indicators. *Bioorg. Med. Chem. Lett.* **11**, 2903-2905.
- López, J. J., Camello-Almaraz, C., Pariente, J. A., Salido, G. M. and Rosado, J. A. (2005).  $\text{Ca}^{2+}$  accumulation into acidic organelles mediated by  $\text{Ca}^{2+}$ - and vacuolar  $\text{H}^+$ -ATPases in human platelets. *Biochem. J.* **390**, 243-252.
- López Sanjurjo, C. I., Tovey, S. C., Prole, D. L. and Taylor, C. W. (2013). Lysosomes shape  $\text{Ins}(1,4,5)\text{P}_3$ -evoked  $\text{Ca}^{2+}$  signals by selectively sequestering  $\text{Ca}^{2+}$  released from the endoplasmic reticulum. *J. Cell Sci.* **126**, 289-300.
- Luzio, J. P., Hackmann, Y., Dieckmann, N. M. G. and Griffiths, G. M. (2014). The biogenesis of lysosomes and lysosome-related organelles. *Cold Spring Harb. Perspect. Biol.* **6**, a016840.
- Lytton, J., Westlin, M., Burk, S. E., Shull, G. E. and MacLennan, D. H. (1992). Functional comparisons between isoforms of the sarcoplasmic or endoplasmic reticulum family of calcium pumps. *J. Biol. Chem.* **267**, 14483-14489.
- McGuire, M. J., Lipsky, P. E. and Thiele, D. L. (1992). Purification and characterization of dipeptidyl peptidase I from human spleen. *Arch. Biochem. Biophys.* **295**, 280-288.
- Melchionda, M., Pittman, J. K., Mayor, R. and Patel, S. (2016).  $\text{Ca}^{2+}/\text{H}^+$  exchange by acidic organelles regulates cell migration in vivo. *J. Cell Biol.* **212**, 803-813.
- Méthot, N., Rubin, J., Guay, D., Beaulieu, C., Ethier, D., Reddy, T. J., Riendeau, D. and Percival, M. D. (2007). Inhibition of the activation of multiple serine proteases with a cathepsin C inhibitor requires sustained exposure to prevent proenzyme processing. *J. Biol. Chem.* **282**, 20836-20846.
- Morgan, A. J. and Galione, A. (2007). NAADP induces pH changes in the lumen of acidic  $\text{Ca}^{2+}$  stores. *Biochem. J.* **402**, 301-310.
- Morgan, A. J., Platt, F. M., Lloyd-Evans, E. and Galione, A. (2011). Molecular mechanisms of endolysosomal  $\text{Ca}^{2+}$  signalling in health and disease. *Biochem. J.* **439**, 349-374.
- Nadanaciva, S., Lu, S., Gebhard, D. F., Jessen, B. A., Pennie, W. D. and Will, Y. (2011). A high content screening assay for identifying lysosomotropic compounds. *Toxicol. In Vitro* **25**, 715-723.
- Nilsson, C., Johansson, U., Johansson, A.-C., Kågedal, K. and Öllinger, K. (2006). Cytosolic acidification and lysosomal alkalization during TNF-alpha induced apoptosis in U937 cells. *Apoptosis* **11**, 1149-1159.
- Penny, C. J., Kilpatrick, B. S., Han, J. M., Sneyd, J. and Patel, S. (2014). A computational model of lysosome-ER  $\text{Ca}^{2+}$  microdomains. *J. Cell Sci.* **127**, 2934-2943.
- Penny, C. J., Kilpatrick, B. S., Eden, E. R. and Patel, S. (2015). Coupling acidic organelles with the ER through  $\text{Ca}^{2+}$  microdomains at membrane contact sites. *Cell Calcium* **58**, 387-396.
- Ran, F. A., Hsu, P. D., Wright, J., Agarwala, V., Scott, D. A. and Zhang, F. (2013). Genome engineering using the CRISPR-Cas9 system. *Nat. Prot.* **8**, 2281-2308.
- Rao, N. V., Rao, G. V. and Hoidal, J. R. (1997). Human dipeptidyl-peptidase I. Gene characterization, localization, and expression. *J. Biol. Chem.* **272**, 10260-10265.

- Repnik, U., Borg Distefano, M., Speth, M. T., Ng, M. Y. W., Progida, C., Hoflack, B., Gruenberg, J. and Griffiths, G. (2017). L-leucyl-L-leucine methyl ester does not release cysteine cathepsins to the cytosol but inactivates them in transiently permeabilized lysosomes. *J. Cell Sci.* **130**, 3124-3140.
- Ruas, M., Davis, L. C., Chen, C.-C., Morgan, A. J., Chuang, K.-T., Walseth, T. F., Grimm, C., Garnham, C., Powell, T., Platt, N. et al. (2015). Expression of Ca<sup>2+</sup>-permeable two-pore channels rescues NAADP signalling in TPC-deficient cells. *EMBO J.* **34**, 1743-1758.
- Rubinsztein, D. C., Codogno, P. and Levine, B. (2012). Autophagy modulation as a potential therapeutic target for diverse diseases. *Nat. Rev. Drug Discov.* **11**, 709-730.
- Sabatini, D. M. (2017). Twenty-five years of mTOR: uncovering the link from nutrients to growth. *Proc. Natl. Acad. Sci. USA* **114**, 11818-11825.
- Sander, J. D., Maeder, M. L., Reyon, D., Voytas, D. F., Joung, J. K. and Dobbs, D. (2010). ZIFIT (Zinc Finger Targeter): an updated zinc finger engineering tool. *Nucleic Acids Res.* **38**, W462-W468.
- Schindelin, J., Arganda-Carreras, I., Frise, E., Kaynig, V., Longair, M., Pietzsch, T., Preibisch, S., Rueden, C., Saalfeld, S., Schmid, B. et al. (2012). Fiji: an open-source platform for biological-image analysis. *Nat. Methods* **9**, 676-682.
- Schreiber, R. (2005). Ca<sup>2+</sup> signaling, intracellular pH and cell volume in cell proliferation. *J. Membr. Biol.* **205**, 129-137.
- Shorte, S. L., Collingridge, G. L., Randall, A. D., Chappell, J. B. and Schofield, J. G. (1991). Ammonium ions mobilize calcium from an internal pool which is insensitive to TRH and ionomycin in bovine anterior pituitary cells. *Cell Calcium* **12**, 301-312.
- Siskind, M. S., McCoy, C. E., Chobanian, A. and Schwartz, J. H. (1989). Regulation of intracellular calcium by cell pH in vascular smooth muscle cells. *Am. J. Physiol.* **256**, C234-C240.
- Speake, T. and Elliott, A. C. (1998). Modulation of calcium signals by intracellular pH in isolated rat pancreatic acinar cells. *J. Physiol.* **506**, 415-430.
- Taylor, E. J. A., Pantazaka, E., Shelley, K. L. and Taylor, C. W. (2017). Prostaglandin E<sub>2</sub> inhibits histamine-evoked Ca<sup>2+</sup> release in human aortic smooth muscle cells through hyperactive cAMP signaling junctions and protein kinase A. *Mol. Pharmacol.* **92**, 533-545.
- Thelen, A. M. and Zoncu, R. (2017). Emerging roles for the lysosome in lipid metabolism. *Trends Cell Biol.* **27**, 833-850.
- Thiele, D. L. and Lipsky, P. E. (1990). Mechanism of L-leucyl-L-leucine methyl ester-mediated killing of cytotoxic lymphocytes: dependence on a lysosomal thiol protease, dipeptidyl peptidase I, that is enriched in these cells. *Proc. Natl. Acad. Sci. USA* **87**, 83-87.
- Tinevez, J.-Y., Perry, N., Schindelin, J., Hoopes, G. M., Reynolds, G. D., Laplantine, E., Bednarek, S. Y., Shorte, S. L. and Eliceiri, K. W. (2017). TrackMate: an open and extensible platform for single-particle tracking. *Methods* **115**, 80-90.
- Tong, J., Du, G. G., Chen, S. R. W. and MacLennan, D. H. (1999). HEK-293 cells possess a carbachol- and thapsigargin-sensitive intracellular Ca<sup>2+</sup> store that is responsive to stop-flow medium changes and insensitive to caffeine and ryanodine. *Biochem. J.* **343**, 39-44.
- Uchimoto, T., Nohara, H., Kamehara, R., Iwamura, M., Watanabe, N. and Kobayashi, Y. (1999). Mechanism of apoptosis induced by a lysosomotropic agent, L-leucyl-L-leucine methyl ester. *Apoptosis* **4**, 357-362.
- Villamil Giraldo, A. M., Appelqvist, H., Ederth, T. and Öllinger, K. (2014). Lysosomotropic agents: impact on lysosomal membrane permeabilization and cell death. *Biochem. Soc. Trans.* **42**, 1460-1464.
- Wakabayashi, I., Poteser, M. and Groschner, K. (2006). Intracellular pH as a determinant of vascular smooth muscle function. *J. Vasc. Res.* **43**, 238-250.
- Wang, Q.-C., Zheng, Q., Tan, H., Zhang, B., Li, X., Yang, Y., Yu, J., Liu, Y., Chai, H., Wang, X. et al. (2016). TMCO1 is an ER Ca<sup>2+</sup> load-activated Ca<sup>2+</sup> channel. *Cell* **165**, 1454-1466.
- Willoughby, D., Thomas, R. C. and Schwiening, C. J. (2001). The effects of intracellular pH changes on resting cytosolic calcium in voltage-clamped snail neurones. *J. Physiol.* **530**, 405-416.
- Wolters, P. J. and Chapman, H. A. (2000). Importance of lysosomal cysteine proteases in lung disease. *Respir. Res.* **1**, 170-177.
- Yodozawa, S., Speake, T. and Elliott, A. (1997). Intracellular alkalinization mobilizes calcium from agonist-sensitive pools in rat lacrimal acinar cells. *J. Physiol.* **499**, 601-611.
